# Supplementary material for: Magnetic properties of Fe intercalation FexTaSe2
Source: Frontiers journal article supplement (doi:10.3389/fphy.2024.1371171), 2024-02-14
Supplement: Data_Sheet_1.docx [file Data_Sheet_1.docx]

***Supplementary Materials***

**1 Supplementary Figures**


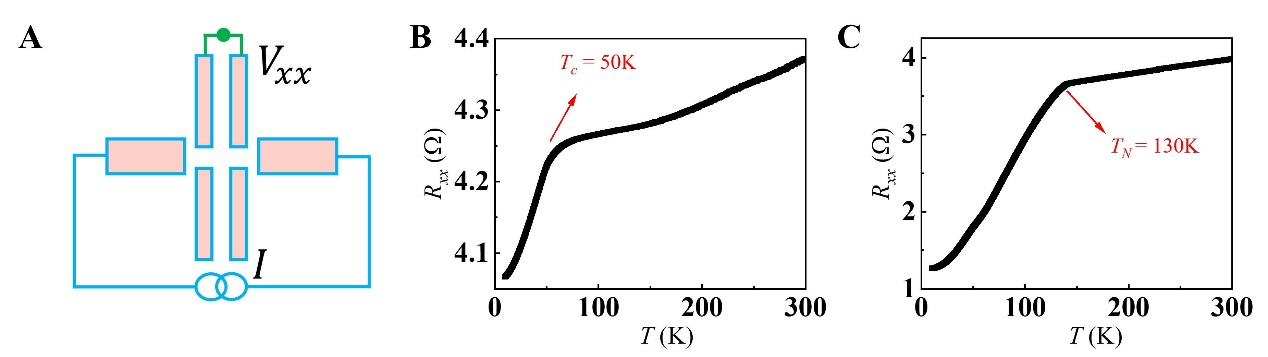


**Supplementary Figure 1 (A)** Schematic of the experimental configuration diagram. **(B)** The curve of zero-field correlation resistance Rxx versus temperature for Fe0.12TaSe2. **(C)** The curve of zero-field correlation resistance Rxx versus temperature for Fe0.25TaSe2.
